# Supplementary material
Source: publisher figshare collection journal article supplement (https://gsajournals.figshare.com/ndownloader/files/26557625)
Supplement: Supplementary file 1 [file 26557625]

## Sheet: Sheet1
Table S8. EggNOG gene mapping of chromosome five region of interest.
Allocated EggNOG Category	Number of annotated genes (#)	Proportion of annotated genes (%)
Information Storage and Processing
Transcription	13	5.39
Replication, recombination and repair	11	4.56
RNA processing and modification	7	2.9
Other	9	3.73
Cellular Processes and Signalling
Posttranslational modification, protein turnover & chaperones	21	8.71
Signal transduction mechanisms	8	3.32
Intracellular trafficking, secretion, and vesicular transport	6	2.49
Other	7	2.9
Metabolism
Amino acid transport and metabolism	16	6.64
Carbohydrate transport and metabolism	15	6.22
Secondary metabolites biosynthesis, transport and catabolism	10	4.15
Lipid transport and metabolism	6	2.49
Inorganic ion transport and metabolism	3	1.24
Coenzyme transport and metabolism	3	1.24
Nucleotide transport and metabolism	2	0.83
Energy production and conversion	2	0.83
Summary
Function unknown	102	42.32
Characterised	139	57.68
Allocation of Hermetia illucens gene annotations using the EggNOG database to assign gene orthology to the 17.6 Mb region of interest on chromosome five.
